# Supplementary material
Source: Springer Nature journal article supplement (https://www.springermedizin.de/resource/supplementary/12903_2014_472_MOESM1_ESM.pdf/9516764)

Preventive Activities (%)

Diagnostic & Clinical Treatment Activities (%)

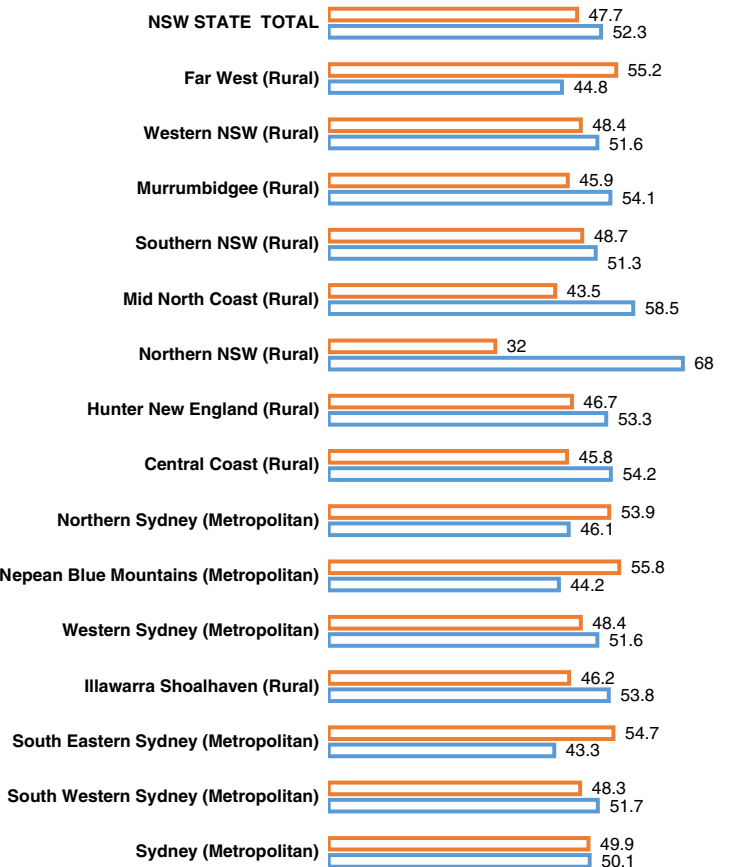

0

20

40

60

80

Supplement: MOESM1 [file 9516764]
